1 Pectin induced colony expansion of soil-derived Flavobacterium strains

2

3 Judith Kraut-Cohen<sup>a</sup>, Orr H.Shapiro<sup>b</sup>, Barak Dror<sup>ac</sup> Eddie Cytryn<sup>a</sup>

4

5 <sup>a</sup>Institute of Soil, Water and Environmental Sciences, Agricultural Research  
6 Organization, Volcani Center, P.O Box 15159, Rishon LeZion 7505101, Israel

7 <sup>b</sup>Institute of Postharvest and Food Sciences, Agricultural Research Organization,  
8 Volcani Center, P.O Box 15159, Rishon LeZion 7505101, Israel

9 <sup>c</sup>Department of Plant Pathology and Microbiology, The R.H. Smith Faculty of  
10 Agriculture, Food and Environment, The Hebrew University of Jerusalem, Rehovot,  
11 Israel

12

13 Running title: Pectin induces Flavobacteria colony expansion

14 #Address correspondence to Eddie Cytryn, eddie@volcani.agri.gov.il.

15 \*Present address: Agricultural Research Organization - the Volcani Center,  
16 68 HaMaccabim Road , P.O.B 15159 Rishon LeZion 7505101, Israel.

17

18 Word count: 5591

19 Number of figures: 4

20

21

22

23

24

25

26

27

## 28 **Contribution to the field statement**

29 Members of the *Flavobacterium* genus are frequently rhizosphere competent, *i.e.*  
30 abundant and generally enriched on root surfaces relative to surrounding bulk soil, and  
31 previous studies suggest that they may play a role in plant health and ecosystem  
32 functioning. However, little is known about genetic and physiological factors that  
33 facilitate flavobacterial colonization and proliferation in this highly competitive  
34 environment.

35 In this study we found that pectin stimulates flavobacterial colonies in a bi-phasic  
36 manner, initially characterized by rapid expansion on agar followed by increased  
37 biomass production. This appears to be linked to pectin-stimulated induction of specific  
38 TonB-associated proteins evidentially involved in the binding and uptake of complex  
39 sugars. Given the fact that pectin and other glycans are a primary component of plant  
40 cell walls, we hypothesize that these mechanisms are at least partially responsible for  
41 the rhizosphere competence of flavobacteria.

42

43

44

45

46

47

48

49

50

51

52

53

54 **Abstract**

55 The genus *Flavobacterium* is characterized by the capacity to metabolize complex  
56 organic compounds and a unique gliding motility mechanism. They are often abundant  
57 in root microbiomes of various plants, but the factors contributing to this high  
58 abundance are currently unknown. In this study, we evaluated the effect of various  
59 plant-associated poly- and mono-saccharides on colony expansion of two  
60 *Flavobacterium* strains. Both strains were able to spread on pectin and other  
61 polysaccharides such as microcrystalline cellulose. However, only pectin (but not  
62 pectin monomers), a component of plant cell walls, enhanced colony expansion on solid  
63 surfaces in a dose- and substrate-dependent manner. On pectin, flavobacteria exhibited  
64 bi-phasic motility, with an initial phase of rapid expansion, followed by growth within  
65 the colonized area. Proteomic and gene expression analyses revealed significant  
66 induction of carbohydrate metabolism related proteins when flavobacteria were grown  
67 on pectin, including selected SusC/D, TonB-dependent glycan transport operons. Our  
68 results show a positive correlation between colony expansion and the upregulation of  
69 proteins involved in sugar uptake, suggesting an unknown linkage between specific  
70 operons encoding for glycan uptake and metabolism and flavobacterial expansion.  
71 Furthermore, within the context of flavobacterial-plant interactions, they suggest that  
72 pectin may facilitate flavobacterial expansion on plant surfaces in addition to serving  
73 as an essential carbon source.

74

75 **Keywords:** *Flavobacterium*, colony expansion, Pectin, TonB, polysaccharides

76

77

78

79

80

81

82

## 83 **Introduction**

84 The complex interactions between plant-associated microorganisms and their hosts  
85 (collectively referred to as the "plant holobiont") are crucial for plant health and growth  
86 (Berendsen et al., 2012; Bulgarelli et al., 2013; Reinhold-Hurek et al., 2015). Plants  
87 modulate their rhizospheres, by exuding various small molecular weight compounds  
88 (rhizodeposits) such as sugars, amino acids and organic acids, by rhizodepositing root  
89 cap border cells, and by releasing various mono- and poly-saccharides in their mucilage  
90 (Dennis et al., 2010; Barret et al., 2011; Beauregard et al., 2013; Reinhold-Hurek et al.,  
91 2015; Massalha et al., 2017; Sasse et al., 2018). Collectively, these rhizodeposits, create  
92 a nutrient rich environment relative to the surrounding bulk soil, which facilitates  
93 colonization by soil microorganisms. Root colonizing bacteria can outcompete other  
94 soil bacteria by a combination of specific traits collectively coined "rhizosphere  
95 competence", which include: motility, resistance to stress, ability to utilize plant-  
96 derived organic compounds, chemotaxis, and the production of secondary metabolites  
97 (Barret et al., 2011). Some earlier studies demonstrated that root-associated  
98 (rhizoplane) bacteria are attracted to the roots by plant-exuded organic acids such as  
99 malic, citric or fumaric acid and various amino acids (Rudrappa et al., 2008; Williams  
100 et al., 2008; Oku et al., 2012; Webb et al., 2017; Feng et al., 2019). Many of these  
101 sensed chemo-attractants, can also be consumed by the bacteria (Cremer et al., 2019).  
102 Although root recruitment and colonization mechanisms of certain plant-growth-  
103 promoting rhizobacteria (PGPR) have been identified and characterized (Lugtenberg  
104 and Dekkers, 1999; Yan et al., 2008; Pieterse et al., 2014), those responsible for  
105 recruitment of the vast majority of rhizoplane bacteria are currently an enigma.

106 *Flavobacterium* is a Gram-negative genus of bacteria from the phylum *Bacteroidetes*  
107 known to degrade complex organic compounds in freshwater, marine and soil  
108 environments (Kolton et al., 2013; McBride et al., 2014). It is highly abundant in the  
109 rhizoplane of a wide array of plants, in contrast to considerably lower abundance in the  
110 rhizosphere and bulk soil (Johansen et al., 2002; Janssen, 2006; Manter et al., 2010;  
111 Kolton et al., 2011, 2013; Lundberg et al., 2012; Bodenhausen et al., 2013; Bulgarelli  
112 et al., 2015). Several root- and soil-derived flavobacteria were found to antagonize  
113 various plant pathogens in different crops (Gunasinghe et al., 2004; Sang and Kim,  
114 2012; Kolton et al., 2014a; Xue et al., 2015; Kwak et al., 2018), and recently it was  
115 discovered that endophytic *Flavobacterium* strains play a fundamental role in

116 antagonizing phytopathogenic fungi, through specific secondary metabolites (Carrión  
117 et al., 2019). Furthermore, a recent study that applied bacterial network analysis  
118 indicated that Flavobacteria are potential drivers of pathogen suppression in root  
119 ecosystems (Wei et al., 2019). In addition, selected members of this genus have been  
120 characterized as plant growth promoting rhizobacteria (PGPR) of various crops  
121 (Hebbar et al., 1991; Alexander and Stewart, 2001; Gunasinghe et al., 2004; Manter et  
122 al., 2010; Sang et al., 2011; Sang and Kim, 2012).

123 Soil flavobacteria have specialized ability to decompose complex plant derived  
124 polysaccharides, such as pectin and glucomannan and the ability to secrete various  
125 carbohydrate-active enzymes via the *Bacteroidetes* -specific type IX secretion system  
126 (T9SS) (McBride et al., 2009; Kolton et al., 2013; Kharade and McBride, 2015;  
127 McBride and Nakane, 2015; Lauber et al., 2018). Like other *Bacteroidetes*, they contain  
128 a myriad of genes that encode Polysaccharide Utilization Loci (PULs) that are activated  
129 specifically to facilitate glycan capture and sugar uptake (Martens et al., 2009; Jiménez  
130 et al., 2015; Foley et al., 2016). These PULs include outer membrane protein  
131 transducers involved in polysaccharide utilization, which are part of the TonB family,  
132 generally referred to as Starch Utilization System (SUS) proteins. Interestingly,  
133 comparative genomics revealed that genomes of soil and root-associated flavobacterial  
134 strains are significantly enriched with genes associated with plant polysaccharide  
135 degradation relative to aquatic strains from this genus, indicating that physiology of this  
136 genus is strongly influenced by its ecology (Kolton et al., 2013).

137 Most terrestrial *Flavobacterium* strains possess a unique gliding mechanism that  
138 rapidly propels them over solid and semi-solid surfaces. The proteins that comprise this  
139 gliding system are molecularly intertwined with at least fifteen proteins that make up  
140 the T9SS, seven of whom are responsible for the secretion of SprB and RemA adhesins  
141 which are expressed on the cell surface and involved in gliding (Shrivastava et al., 2013;  
142 Johnston et al., 2018). We previously demonstrated that this T9SS-gliding complex is  
143 crucial for root colonization by flavobacteria, and this colonization was positively  
144 linked to the induction of plant resistance to foliar pathogens (Kolton et al., 2014a).

145 Collectively, the above studies strongly suggest that terrestrial flavobacterial strains  
146 have evolved means that enable them to interact with plant roots, and that these  
147 interactions are beneficial to plant health. Nonetheless, the specific mechanisms behind  
148 this phenomenon are currently unclear. In this study, we assessed the impact of an array

149 of plant cell wall-derived substrates on the motility and growth dynamics of  
150 flavobacteria by coupling conventional petri dish assays and live-imaging fluorescent  
151 microscopy with proteomic and gene expression analyses. We demonstrate that pectin,  
152 a plant cell wall-associated polysaccharide, facilitates bi-phasic proliferation over solid  
153 surfaces through induction of specific TonB-associated glycan uptake operons. These  
154 results suggests that the link between pectin, motility and carbohydrate metabolism may  
155 be fundamental to rhizosphere competence in flavobacteria.

156

## 157 **Materials and methods**

### 158 **Bacterial Strains and growth conditions**

159 Flavobacterial strains targeted in this study included *F. johnsoniae* strain UW101  
160 (ATCC17061), a gliding/secretion impaired ( $\Delta gldJ$ ) *F. johnsoniae* strain  
161 UW101 (Braun and McBride, 2005), *Flavobacterium* sp. F52, isolated from the roots of  
162 a greenhouse pepper (Sela et al., 2012; Kolton et al., 2014b), and a gliding/secretion  
163 impaired ( $\Delta gldJ$ ) *Flavobacterium* sp. F52 strain (Kolton et al., 2014b). For live imaging  
164 microscopy (see below) the fluorescent strain *F. johnsoniae* UW101 WT+pAS43  
165 (Flavo GFP) Flavo-ErytR Flavo-CefR, and the gliding/secretion impaired *F. johnsoniae*  
166 UW102-48 ( $\Delta gldJ$ )+pAS43 (Flavo GFP) Flavo-ErytR Flavo-CefR were used (Mcbride  
167 and Baker, 1996; Staroscik et al., 2008). Erythromycin, 100 ug/ml was added to the  
168 media of the GFP labeled bacteria.

169 Flavobacteria strains were grown in CYE medium (Casitone, 10 mg/ml, yeast extract  
170 at 5mg/ml, and 8 mM MgSO<sub>4</sub> in 10 mM Tris buffer [pH 7.6]) at 30°C, as previously  
171 described (Mcbride and Baker, 1996). To observe colony-spreading, bacteria were  
172 grown on PY2 agar medium (2 g peptone, 0.5 g yeast extract, 10 mg/ml agar, pH 7.3) at  
173 30°C (Agarwal S. et al., 2001).

### 174 **Organic amendments to growth media**

175 A suite of mono- and polysaccharides were amended to growth media in various  
176 configurations (as described below), to evaluate colony spreading dynamics of the  
177 selected flavobacterial strains. The following substances were used in this study: pectin  
178 (Sigma P9135), D(+)-glucose (Fischer scientific 10373242), microcrystalline cellulose  
179 (M.cellulose- partially depolymerized cellulose synthesized from an  $\alpha$ -cellulose

180 precursor, Merck 102331), D(-)-arabinose (Acros 161451000), glucomannan (Megazyme  
181 P-GLCML), , L-rhamnose (Sigma 83650) and D(+)-galacturonic acid monohydrate  
182 (Sigma 48280-5G-F), Polyethylene Glycol (PEG) 8000 (Amresco 0159). All  
183 substances were dissolved and suspended to 2% final concentration in double distilled  
184 water (DDW), unless indicated otherwise. Glucose, arabinose, rhamnose and  
185 galacturonic acid (titrated to pH 7) were dissolved and filtered through a 0.22-micron  
186 filter. Pectin was dissolved in DDW heated at 80°C, and subsequently filtered through  
187 0.45-micron filters. M.cellulose, and glucomannan were mixed with DDW heated to  
188 50°C and then autoclaved for 20 min.

### 189 **Flavobacterial growth on various plant-derived poly- and mono- saccharides**

190 The selected plant-derived poly- and mono- saccharides were amended to the PY2 agar  
191 plates in two manners: (i) to test the effect of specific carbon sources on the directional  
192 proliferation of flavobacteria, 10 µl of the selected compounds were thinly applied  
193 along a line projecting outward from the center of the petri dish using a pipetor (**FigS1**);  
194 (ii) to test the effect of specific carbon sources on the general proliferation of  
195 flavobacteria, 500µl from each 2% sugar solution were uniformly smeared over the  
196 entire petri dish (**Fig1A, C, Fig2A**). Non-soluble substances such as M.cellulose were  
197 vigorously vortexed and dispensed using a cut tip. Where two sugars were used (*i.e.*  
198 rhamnose+ galacturonic acid) we added 250µl of each. In all cases, plates were left to  
199 dry overnight after adding organic amendments. Flavobacteria were incubated on CYE  
200 media overnight, colonies were harvested and subsequently diluted in 200ul saline to  
201 0.6-1 OD ( $5 \times 10^9$ - $1.12 \times 10^{10}$  cells), vortexed well, and 2ul were spotted in the center of  
202 PY2 agar covered or streaked with the selected plant-derived poly- and mono-  
203 saccharides as indicated above. Plates were left to dry for 15min and then incubated for  
204 48 hours at 30°C. The colony area or the length of expansion (in cm) were measured  
205 using Fiji (Schindelin et al., 2012) and statistics was calculated using JMP®,  
206 Version Pro 14 (SAS Institute Inc., Cary, NC, 1989-2019). Differences between  
207 length/area were considered as significantly different when  $p < 0.05$  in Tukey HSD test  
208 unless indicated differently.

### 209 **Live Imaging Fluorescent Microscopy Experiments**

210 To visualize the effect of different mono- and polysaccharides on *F. johnsoniae* colony  
211 expansion, we filled the wells of a 24 well plate with 500µl of PY2 agar. Subsequently,

212 10ul of the mono- and polysaccharides (2%) or the control (DDW) were gently applied  
213 to the wells in triplicates, plates were rotated for 1hour and dried overnight at room  
214 temperature. A 30G needle (KDL 16-0310) was used to seed the bacteria in the center  
215 of each well by punching an agar plate with a 24hr grown colony. Microscopic imaging  
216 was performed using a NIKON eclipse Ti microscope (Nikon, Japan) equipped with a  
217 ProScan motorized XY stage, an HF110A system (enabling rapid switching of emission  
218 filters)(Prior Scientific, MA, USA) and a temperature-controlled stage incubator (on  
219 25°C) (LAUDA ECO RE 415, Korea). Bright field illumination was provided by a cool  
220 LED pE-100A (Cool LED, UK). Excitation light for epifluorescence microscopy was  
221 provided by a Spectra X light engine (Lumencor, USA). Imaging was performed using  
222 a long working distance 40X objective (NA 0.6) (Nikon, Japan). Images were captured  
223 at 2 hr intervals for 44 hr using an ANDOR zyla 5.5 MP sCMOS camera (Oxford  
224 Instruments, UK).

225 Images were processed using the NIS elements AR 4.6 (64 bit) software package  
226 (Nikon, Japan) and Fiji (Schindelin et al., 2012). Fluorescence level was normalized to  
227 the initial measured value (to avoid differences in the initial number of seeded bacteria)  
228 and to the maximal fluorescence on PY2 media amended with DDW (to reduce  
229 variability of GFP fluorescence levels between movies). The population growth  
230 dynamic of GFP- *F. johnsoniae* on each substance computed using Fiji's time series  
231 analyzer plugin, and average fluorescence density profiles of the expanding population  
232 over time was quantified using JMP®, Version Pro 14. (SAS Institute Inc., Cary, NC,  
233 1989-2019).

### 234 **Proteomic Sample preparation**

235 Wild type *F. johnsoniae*, was grown on PY2 agar plates smeared either with 500µl of  
236 2% pectin or with DDW, in triplicates. After 48hr, bacteria were scraped from plates  
237 in 1ml of 4°C PBS and centrifuged for 10 min, 4500rpm in 4°C. Supernatant was  
238 discarded and bacterial pellets were processed.

239 Samples were subjected to in-solution tryptic digestion using a modified Filter Aided  
240 Sample Preparation protocol (FASP). Sodium dodecyl sulfate buffer (SDS) included:  
241 4% (w/v) SDS, 100mM Tris/HCl pH 7.6, 0.1M DTT. Urea buffer (UB): 8 M urea  
242 (Sigma, U5128) in 0.1 M Tris/HCl pH 8.0 and 50mM Ammonium Bicarbonate.  
243 Bacterial cell pellets were lysed in SDS buffer. Lysate was centrifuged at 16,000 g for



244 10min. 50 ug total protein were mixed with 2 mL UB, loaded onto 30 kDa molecular  
245 weight cutoff filters (Sartorius VS15RH22) and centrifuged. 1.5 ml of UB were added  
246 to the filter unit, and centrifuged at 14,000 g for 40 min. Proteins were alkylated using  
247 iodoacetamide (10 mM final concentration) and washed twice with Ammonium  
248 Bicarbonate. Trypsin was then added (50:1 protein amount:trypsin) and samples  
249 incubated at 37°C overnight, followed by a second trypsin digestion for 4 hours at 37°C.  
250 Digested peptides were then collected in a clean tube by centrifugation, acidified with  
251 trifluoroacetic acid, desalted using HBL Oasis (Waters 094225), speed vacuumed to  
252 dryness and stored in -80°C until analysis. All chemicals used were from Sigma  
253 Aldrich, unless stated otherwise. Sample preparation and initial statistical analysis was  
254 performed at the Nancy and Stephen Grand Israel National Center for Personalized  
255 Medicine, The Weizmann Institute of Science, Rehovot, Israel.

#### 256 **Liquid chromatography and proteomics analysis**

257 Each sample was loaded and analyzed using split-less nano-Ultra Performance Liquid  
258 Chromatography (10 kpsi nanoAcquity; Waters, Milford, MA, USA). The mobile phase  
259 was: A) H<sub>2</sub>O + 0.1% formic acid and B) acetonitrile + 0.1% formic acid. Desalting of  
260 the samples was performed online using a Symmetry C18 reversed-phase trapping  
261 column (180 µm internal diameter, 20 mm length, 5 µm particle size; Waters). The  
262 peptides were then separated using a T3 HSS nano-column (75 µm internal diameter,  
263 250 mm length, 1.8 µm particle size; Waters) at 0.35 µL/min. Peptides were eluted from  
264 the column into the mass spectrometer using the following gradient: 4% to 20%B in  
265 155 min, 20% to 90%B in 5 min, maintained at 90% for 5 min and then back to initial  
266 conditions. ULC/MS grade solvents were used for all chromatographic steps. Each  
267 sample was analyzed on the instrument separately in a random order in discovery mode.  
268 Raw data was searched against the *F. johnsoniae* protein databases, to which a list of  
269 common lab contaminants was added. Database search was done using the Mascot  
270 algorithm, and quantitative analysis was performed using the Expressionist software  
271 from GeneData. A student's t-test based on log-transformed intensity values was  
272 performed determine significant differences in protein expression between colonies  
273 grown with and without pectin. As a rule of thumb we consider significant differences  
274 to be >1 peptide per protein, fold change >2 or <0.5, and <0.05 p-value. Proteins were  
275 functionally annotated using RAST (Rapid Annotations using Subsystems Technology)  
276 (Overbeek et al., 2014).

277 Twenty-five pectin-induced proteins were selected based on high fold change between  
278 PY2 agar coated with pectin vs. PY2 agar coated with DDW and statistical significance  
279 (proteins without annotation were removed from this analysis). Gene abundance across  
280 the dataset was normalized to 100% for each gene, and a heatmap was created using  
281 [studio.plot.ly \(https://plotly.com/\)](https://plotly.com/).

282 The mass spectrometry proteomic data was deposited to the ProteomeXchange  
283 Consortium through the PRIDE partner repository (Perez-Riverol et al., 2019) under  
284 the dataset identifier PXD023649.

### 285 **RNA extraction**

286 To assess the expression of selected genes in the presence of pectin, total RNA was  
287 extracted from *F. johnsoniae* cells grown for 48 hours at 30°C on PY2 plates covered  
288 with 500µl of DDW or 2% pectin as described above. For each plate, bacteria were  
289 suspended in 1 ml cold (4°C) PBS buffer, washed once in cold PBS, centrifuged for  
290 2min at 18,000g, resuspended in TE buffer supplemented with 0.4mg/ml lysozyme and  
291 then incubated for 10 min at room temperature. RNA was subsequently extracted from  
292 cells using the TRIzol reagent (TRIzol® Invitrogen™, #15596026), following the  
293 manufacturer's instructions. Residual DNA was removed from the RNA samples by  
294 digesting with RQ1 DNase (Promega M6101A) at 37°C for 40 min. For the real time  
295 experiments, cDNA was synthesized using 50ng of DNase treated RNA, with 1ul of  
296 random primers (Promega C118A). Synthesis of single strand cDNA was achieved  
297 using ImProm-IITM Reverse-Transcriptase (Promega, Madison, WI, United States).

298 The integrity and concentration of the extracted RNA and cDNA, was examined with a  
299 Qubit™ 3.0 Fluorometer (Thermo Fisher Scientific, United States) using reagents and  
300 protocols supplied by the manufacturer, and by electrophoresis of samples on a 0.8%  
301 agarose gel.

### 302 **Quantitative PCR Assessment of Gene Expression Levels**

303 The expression of 10 genes encoding for proteins found to be significantly induced on  
304 pectin in the proteomic analyses were analyzed using qPCR. Primers for qRT-PCR  
305 experiments (**Table S5**) were constructed based on the *F. johnsoniae* genome sequence  
306 and were pre-designed using the PrimerQuest® tool (Integrated DNA Technologies,  
307 USA). Triplicate cDNA samples for each of the treatments (with or without pectin)  
308 were diluted and 2ng was used in a 20 µl final reaction volume together with 10ul Fast

309 SYBR<sup>TM</sup> green PCR master mix (Thermo Fisher scientific), 100 nM each of forward  
310 and reverse primers, DDW and 1ul of template cDNA. Amplification was carried out  
311 on a StepOnePlus real-time PCR thermocycler (Applied Biosystems, Foster City, CA,  
312 United States) using the following program: heat activation of DNA polymerase at  
313 95°C for 3 min and 40 cycles at 95°C for 5 sec for denaturation and primer annealing  
314 and extension at 60°C for 30 sec. A melting curve was produced to confirm a single  
315 gene-specific peak and to detect primer-dimer formation by heating the samples from  
316 60 to 95°C in 0.3°C increments. Gene amplification was confirmed by detection of a  
317 single peak in the melting curve analysis. For each gene, PCR gene amplification was  
318 carried out using three independent biological replicates. Expression of each of the  
319 targeted genes was normalized to that of three alternative housekeeping genes (16S  
320 rRNA, DNA gyrase subunit B (*gyrB*, EC 5.99.1.3), and the electron transfer  
321 flavoprotein, alpha subunit (ETF) threonine synthase (EC 4.2.3.1). These genes were  
322 selected because there was no detected difference in their expression when grown on  
323 PY2 media amended with pectin vs. DDW in the proteomic analysis. The relative  
324 abundance of each target gene relative to a reference gene was determined according to  
325 the method described previously (Livak and Schmittgen2001). Concentrations and  
326  $\Delta\Delta CT$  values were calculated and analyzed with the StepOne software v2.3 (Applied  
327 Biosystems, Foster City, CA, United States). Concomitant “no-RT” reactions,  
328 lacking reverse transcriptase, were performed for each sample and run to confirm  
329 absence of DNA contamination, as well as no template controls (NTCs) to confirm lack  
330 of contamination. Reaction efficiency was monitored by means of an in internal  
331 standard curve using a 10-fold dilution of DNA ranging from 0.01-10ng of DNA per  
332 reaction, in triplicates. Efficiency was between 92.1 and 97.2% for all primers, and R2-  
333 values were greater than 0.99. Data analysis was conducted using the StepOne software  
334 v2.3 (Applied Biosystems, Foster City, CA, United States).

335

## 336 **Results**

### 337 **Growth of *Flavobacterium* strains on various carbon sources**

338 We evaluated growth dynamics of flavobacteria on rich media (PY2 agar) coated with  
339 selected plant-derived poly- and mono- saccharides (**Fig1A**). Colony expansion of *F.*  
340 *johnsoniae* on PY2 agar media coated with pectin was close to five times higher than

341 on the same media coated with other analyzed mono- and polysaccharides or with  
342 DDW, (control) ( $p < 0.05$ , Tukey-Kramer HSD test) (**Fig1B**). Wild type (WT) and  
343 gliding/typeIX secretion system mutants ( $\Delta gldJ$ ) of *F. johnsoniae* and the pepper root  
344 isolate *Flavobacterium* sp. F52 were inoculated in the center of PY2 agar media  
345 amended with or without pectin (**Fig1C**). When grown on pectin, WT colonies of both  
346 *Flavobacterium* strains significantly expanded after 48 hours of incubation, while  
347 growth was reduced in the control without pectin (DDW). In contrast, gliding mutant  
348 ( $\Delta gldJ$ ) colonies of both flavobacterial strains did not expand (**Fig1C, D**), indicating  
349 that the gliding apparatus is a prerequisite for pectin-induced colony expansion.

### 350 **Dose-dependent pectin facilitated colony expansion**

351 To determine whether expansion on pectin is dose dependent, *F. johnsoniae* and  
352 *Flavobacterium* sp.F52 strains were inoculated at the center of PY2 agar media plates  
353 streaked with pectin at final concentrations of 0.5, 1, 2 and 4%. For all the examined  
354 pectin concentrations colonies radiated along the pectin streaks, but expansion was  
355 more significant on 2% and 4% pectin ( $p < 0.05$ , Tukey-Kramer HSD test) (**FigS1**).

356 Since galacturonic acid and rhamnose are the two major components of pectins, we  
357 examined the colony expansion of *F. johnsoniae* on PY2 agar coated with 2% titrated  
358 galacturonic acid, 2% rhamnose, a combination of galacturonic acid and rhamnose, 2%  
359 pectin and DDW. *F. johnsoniae* expansion on galacturonic acid, rhamnose (alone or  
360 combined) did not facilitate significant colony expansion ( $p < 0.05$ , Tukey-Kramer HSD  
361 test) in contrast to colonies that were grown on pectin (**Fig2**).

### 362 **Temporal dynamics of pectin induced *F. johnsoniae* colony expansion**

363 The expansion of green fluorescent protein (GFP)-labeled *F. johnsoniae* on PY2 agar  
364 coated with glucose, M.cellulose, glucomannan, Peg8000, pectin or DDW (without  
365 sugar amendment), was visualized at a higher resolution using time-lapse microscopy.  
366 Colony morphology after 32 hours, on each tested substance is presented in **Fig3A**.

367 Growth dynamics were clearly affected by the sugar type. Expansion on pectin was  
368 characterized by a relatively long lag phase. However following this stage, colonies  
369 rapidly expanded and after 22 hours, the fluorescent signal of colonies grown on pectin  
370 surpassed both the control (without sugar amendment) and the glucose (according to  
371 Student T test test) and other amended compounds, after 36 hours. Plates coated with  
372 polyethylene glycol (PEG8000) served as an additional control to rule out

373 mechanosensitivity associated with substrate stiffness (Tchoufag et al., 2019), since its  
374 viscosity is similar to that of pectin. Colony expansion on Peg8000 was similar to the  
375 DDW control without amended sugars, suggesting that effects were specific to pectin.  
376 Growth on pectin facilitated multiple ring-like microstructures that resemble previously  
377 described “raft” structures (Gorski et al., 1993) (**Fig3B, Supplementary movie S1**).  
378 Conversely, expansion of colonies on glucose did not display this bi-phasic expansion.  
379 While bi-phasic growth was observed in all of the non-amended and amended plates,  
380 this phenomenon was most pronounced in the pectin-amended plates (**Supplementary**  
381 **movie S1**). Bacterial colonies grown on glucose expanded the least resulting in  
382 compact, small colonies with less ringed structures, suggesting that glucose has an  
383 inhibitory effect on *F. johnsoniae* motility and possibly growth as was previously  
384 demonstrated (**Fig3C**) (Wolkin and Pate, 1984; Imamura et al., 2018). The most  
385 significant expansion observed between 6 to 20 hours was on M.cellulose , but the  
386 colonies grown on glucomannan and pectin proliferated at later times, and the colonies  
387 grown on pectin reached the greatest intensity at 44 hours (**Fig3C**), thereby surpassing  
388 the colonies grown on other sugar sources ( $p < 0.05$ , Tukey-Kramer HSD test). The high  
389 sensitivity of the fluorescence detection enabled us to visualize lateral colony expansion  
390 on M.cellulose , which was less visible on agar plates (**Fig1A, movie S1**).

391 We further evaluated the pectin-induced bi-phasic expansion described above. An  
392 initial peak in fluorescence occurred at 20 hours, and a second peak at 36 hours (**Fig3D**).  
393 After 20 hours of growth, total fluorescence was highest in cells grown on pectin,  
394 glucomannan and M.cellulose, and lowest on glucose ( $p < 0.05$ , Tukey-Kramer HSD  
395 test).

396 Next, we estimated the velocity of colony expansion on the selected mono- and  
397 polysaccharides by measuring the time it took the colonies to cross three radials (3mm,  
398 6mm and 9mm), and subsequently calculating the mean velocity from circle to circle  
399 (**Fig3E**). In the first 1.5mm radius, the estimated colony expansion velocity was higher  
400 in pectin and M.cellulose and similar on the rest of the substances. Between 1.5-3mm,  
401 colony expansion on pectin and glucomannan increased. Colony expansion velocity in  
402 the outer circle was similar for all substance except glucose, with pectin still exhibiting  
403 the fastest expansion rates of all the tested mono- and polysaccharides although this  
404 was not statistically significant (**Fig3F**). Thus, *F. johnsoniae* expanded faster on pectin  
405 than on any of the other tested carbon sources (**Fig3G**). Collectively, we conclude that

406 the bi-phasic growth of *F. johnsoniae* is very prominent on pectin. In summary, after  
407 an initial lag phase, *F. johnsoniae* is characterized by a rapid expansion phase, followed  
408 by a slower growth phase where cells appear to spread less and gain biomass.

#### 409 **Specific TonB/Sus transducers are expressed in response to growth on pectin**

410 In order to gain greater insight into the molecular mechanisms associated with  
411 flavobacterial colony expansion on pectin, we conducted a proteomic assay in which  
412 we examined differential intracellular protein expression after 44 hr growth of *F.*  
413 *johnsoniae* on PY2 agar coated with pectin relative to the same rich media coated with  
414 DDW. Eighty-three proteins were more expressed on pectin, whereas forty-three were  
415 more expressed on the DDW control (**Table S1A+B**). A substantial proportion of these  
416 proteins were unassigned, while a large fraction of the proteins (17%, 22% and 37% of  
417 KEGG, SEED and EggNog annotations, respectively) were associated with  
418 carbohydrate metabolism (**FigS2A-C**). Of the 25 most markedly pectin-induced  
419 proteins identified, 13 were involved in polysaccharide uptake, processing and  
420 metabolism, including four Sus C/D related proteins (**Fig4A**). Other pectin-induced  
421 proteins included a novel transcriptional regulator (12-fold higher on pectin) and a  
422 protein associated with auxin regulation (26-fold higher on pectin) (**Table S1A+B**).  
423 Interestingly, none of the differentially synthesized proteins were gliding related (**Table**  
424 **S2**).

425 Of the 44 previously-described SusC and 42 SusD homologues identified in the *F.*  
426 *johnsoniae* genome (McBride et al., 2009), 27 SusC and 15 SusD proteins were detected  
427 in the proteomic analysis, in addition to 610 proteins encoding flanking genes  
428 surrounding these Sus proteins encoding genes that constitute PUL clusters seemingly  
429 associated with glycan metabolism. Of these, three SusC and six SusD proteins along  
430 with 31 associated PUL genes encoding proteins (forming 4 gene clusters **Table S3**)  
431 were significantly induced in response to growth on pectin in the proteomic analysis  
432 (**Table S4**).

433 In order to validate the proteomic results, *F. johnsoniae* cells were again grown on PY2  
434 agar coated with pectin or DDW as described in the proteomic analysis, and the  
435 expression of 8 genes (**Table S5**) were evaluated by quantitative real time PCR. Pectin  
436 did not induce expression of *remA* (WP\_012022896.1) encoding for an adhesion  
437 protein involved in gliding motility (not evaluated in the proteomic analysis since it's

438 an extra-membrane protein), indicating that synthesis of this protein is not enhanced on  
439 pectin at the tested time point. Expression of genes encoding for the novel  
440 transcriptional regulator (Trans. Regul WP\_012022876.1), pectate lyase (Pec lyase  
441 WP\_012026072.1), putative auxin-regulated annotated protein (Auxin  
442 WP\_012023111.1) and tonB 2144 (WP\_012026069.1), were also not differentially  
443 expressed on pectin-coated media despite the fact that they were significantly induced  
444 on pectin in the proteomic analysis. Among the examined TonB/SusC related genes,  
445 tonB 260 (WP\_012026229.1) and sus73 (SHH12854.1) were significantly upregulated  
446 (60-100 fold,  $p < 0.05$  Tukey-Kramer HSD test) while TonB 445 (WP\_012022294.1)  
447 was substantially upregulated (10-20 fold) but not statistically significant (**Fig4B**).  
448 tonB260 and sus73 are part of an 18-gene cluster, of which all of the encoded proteins  
449 were upregulated in the presence of pectin in the proteomic analysis (**cluster 1-Table**  
450 **S3**). Using two different prediction tools, the TonB260 and Sus73 encoding genes were  
451 mapped to the same operon together with a gene encoding for the hydrolytic enzyme  
452 polygalacturonase that cleaves the  $\alpha$  (1-4) bonds between adjacent galacturonic acids  
453 within the homogalacturonic acid backbone of pectin (**Table S6**).

454

## 455 **Discussion**

### 456 **Pectin facilitates rapid spreading of flavobacteria**

457 Results from this study demonstrated that flavobacteria not only metabolize complex  
458 plant cell wall-derived glycans but that these polysaccharides (particularly pectin)  
459 facilitate rapid spreading of flavobacteria over solid surfaces, even when carbon was  
460 not limited. Both the pattern and the extent of *F. johnsoniae* colony expansion was  
461 dictated by the carbon source supplemented to the growth media. The expansion on rich  
462 media coated with pectin and glucomannan was rapid, patchy, non-uniform and sparse  
463 relative to colonies grown on rich media coated with glucose or DDW. On a  
464 microscopic level, this rapid expansion was characterized by ring like micro-structures,  
465 resembling previously described rafts or dendrites (Gorski et al., 1993; Sato et al.,  
466 2021). While the connection between the carbon source and flavobacterial colony  
467 expansion is not clear, the fact that we did not observe rapid expansion or raft-like  
468 structures in flavobacteria grown on PEG8000, indicates that the phenomenon is

469 specifically attributed to the chemical attributes of pectin and not to physical properties  
470 (viscosity) of the growth medium.

471 While previous studies indicate that *F. johnsoniae* cannot utilize non-depolymerized  
472 cellulose or M.cellulose a sole carbon source (McBride et al., 2009), we demonstrate  
473 that colonies of *F. johnsoniae* did expand on rich (PY2) media amended with  
474 M.cellulose in microplate experiments using fluorescent microscopy. It appears that the  
475 bacteria propagated on the microcrystal surfaces without creating a dense colony  
476 structure, suggesting that the bacterium glides along the fibers without actually  
477 metabolizing them. In contrast to pectin, growth on glucose inhibited propagation of  
478 flavobacteria as previously reported (Wolkin and Pate, 1984; Imamura et al., 2018).  
479 Specifically, glucose was shown to inhibit colony spreading via MfsA which encodes  
480 a major facilitator superfamily (MFS) transporter (Imamura et al., 2018), resulting in  
481 absence of raft microstructures that are formed when grown on other carbon sources.  
482 Nonetheless, glucose did not inhibit gliding motility in general (Wolkin and Pate, 1984;  
483 Gorski et al., 1993) and spreading on glucose was recently found to be in inverse  
484 correlation to agar concentration and characterized by unique windmill-like structures  
485 under media of specific glucose-agar levels (Sato et al., 2021)

#### 486 **Pectin induces colony expansion and colonization of soil and root bacteria**

487 Pectin, but not pectin monomers (D-galacturonic acid and L-rhamnose) significantly  
488 facilitated colony expansion in a dose dependent manner. Rhizosphere and  
489 phyllosphere associated flavobacterial genomes are genetically compatible for  
490 metabolizing plant-associated polysaccharides. Specifically, their genome contains  
491 many genes encoding glycohydrolases, polysaccharide lyases, and esterases and can  
492 efficiently degrade complex biopolymers (McBride et al., 2009) and plant-associated  
493 flavobacterial genomes have an over-representation of genes involved in the  
494 metabolism of pectin (Kolton et al., 2013). Beside the ability to degrade pectin and  
495 consume it, the reduced ability of flavobacteria colonies to spread on pectin monomers  
496 (rhamnose or/and galacturonic acid) suggests that the original spatial organization of  
497 plant cell wall components are important for recognition and expansion on it. Due to  
498 the importance of pectin and other glucans in plant cell walls, we hypothesize that soil  
499 and root-associated bacteria have devised different strategies to colonize it and use it as  
500 a cue for colonization and expansion on root surfaces.



501 For example, *Flexibacter* sp. FS-1 was not able to glide on agarose alone but did glide  
502 on agarose amended with 1% pectin (Arlauskas and Burchard, 1982). Purified  
503 Arabidopsis polysaccharides (arabinogalactan, pectin, or xylan) triggered biofilm  
504 formation in *B. subtilis* when added to rich media and induced root colonization  
505 (Beauregard et al., 2013). Similarly, addition of pectin and sucrose to the media of the  
506 PGPR *Bacillus amyloliquefaciens* strain SQY 162, increased bacterial abundance,  
507 induced biofilm formation and improved the ability of the amended bacterium to  
508 suppress tobacco bacterial wilt disease (Wu et al., 2015). In the symbiotic nitrogen  
509 fixing bacterium *Rhizobium leguminosarum*, glucomannan-mediated attachment was  
510 important for legume infection and nodulation (Williams et al., 2008).

### 511 **Growth on Pectin is bi phasic**

512 Live-imaging fluorescent microscopy revealed that *F. johnsoniae* growth on PY2 media  
513 coated with different mono- and polysaccharides was bi-phasic in nature, with an initial  
514 phase of rapid expansion, followed by biomass production within the colonized area.  
515 This bi-phasic growth pattern, which was most pronounced on pectin, resembles  
516 previously described models in motile *E. coli*, which depicted an initial expansion  
517 phase, where "pioneer" bacteria with high velocity advance in front of the colony,  
518 followed by a second phase, where "settler" bacteria grow and replicate locally (Cremer  
519 et al., 2019; Liu et al., 2019). We hypothesize that plant-derived polysaccharides and  
520 especially pectin may serve as signal that facilitates the expansion of "pioneer" cells,  
521 and later as carbon sources that support growth of "settlers".

### 522 **Pectin does not induce gliding-associated proteins**

523 Despite the substantial evidence that pectin stimulated flavobacterial colony expansion,  
524 it did not induce expression of known gliding motility proteins (although not all were  
525 identified in the proteomic analyses) or proteins associated with chemotaxis, nor did it  
526 induce expression of remA, encoding the lectin binding, flavobacterial cell surface  
527 adhesin involved in gliding (Shrivastava et al., 2012). While the specific correlation  
528 between expansion on pectin and the unique flavobacterial gliding motility mechanism  
529 was not determined in this study, it is evident that the latter is required, because gliding  
530 deficient ( $\Delta gldJ$ ) flavobacterial mutants did not expand on pectin. The gliding  
531 machinery might be induced in the earlier phase of the response to pectin, in which we  
532 observed intensive bacterial motility. Alternatively, pectin might facilitate gliding in a

533 protein expression-independent manner or induce other components of the gliding  
534 machinery not identified in our proteomic analyses. A recent study identified two  
535 flavobacterial lipoproteins linked to both biofilm formation and gliding motility (Sato  
536 et al 2021), supporting the notion that other currently hypothetical proteins may also be  
537 linked to colony spreading.

538 Based on proteomic and subsequent qPCR (quantitative real-time PCR) gene  
539 expression validation, we believe that the pectin-induced flavobacterial expansion  
540 observed in this study is at least partially mediated by the induction of specific TonB-  
541 associated PULs. Extrapolation of these lab-based results to flavobacterial-root  
542 interactions, suggesting a link between niche recognition, colony expansion and  
543 metabolic fitness. Similar induction of TonB and PUL was observed in marine  
544 flavobacteria as response to phytoplankton blooms characterized in decomposition of  
545 alga-derived organic matter (Teeling et al., 2012).

546 A few studies have previously linked Ton B proteins with motility, attachment or plant-  
547 bacterial interactions. Ton B was associated with twitching motility in *P. aeruginosa*  
548 (Huang et al., 2004), and was also found to play a role in the ability of *A. baumannii* to  
549 bind to the high-molecular weight glycoprotein fibronectin, indicating the capacity to  
550 bind to extracellular host proteins (Zimblet et al., 2013). In *Xanthomonas campestris*  
551 *pv. Campestris*, pectate sensed by specific TonB-dependent receptors triggered  
552 secretion of extracellular polygalacturonate. This resulted in pectin degradation and  
553 generation of oligogalacturonides (OGA) that are recognized as damage-associated  
554 molecular patterns (DAMPs), facilitating the initiation of the plant defense  
555 mechanisms (Vorhölter et al., 2012). Previous experiments showed that *Pseudomonas*  
556 *putida* mutants that lacked TonB, were deficient in their capacity to uptake iron and  
557 displayed impaired seed colonization, linking *TonB* to metabolic and functional fitness  
558 in plant-associated bacteria (Molina et al., 2005). The high energetic cost and substrate  
559 specificity of TonB transducers explains why the genes encoding them were induced  
560 by pectin and not constitutively expressed (Postle and Kadner, 2003; Postle, 2007).  
561 These proteins may play a pivotal role in flavobacterial-plant interactions, however,  
562 knock-out of specific *tonB* genes in *F. johnsoniae* will be challenging due to the  
563 multitude of predicted *tonB* genes in its genome, which suggests a high level of  
564 functional redundancy (McBride et al., 2009).

565 **Additional pectin-induced proteins**

566 Pectin significantly induced several proteins in addition to TonB related proteins. These  
567 included an auxin-regulated protein, which is especially interesting since auxin is a  
568 major phytohormone responsible for plant growth and development, demonstrating  
569 again a possible connection between pectin sensing and flavobacterial-plant  
570 interactions. Interestingly, pectin resulted in substantial induction of a putative  
571 transcriptional regulator, suggesting pectin-induced regulation of additional genes.  
572 Knocking out or silencing this regulator can shed light on this pectin-induced  
573 downstream response, and its potential role in flavobacterial-plant interactions.

574 The fact that gene expression (qPCR) did not completely correlate with the proteomic  
575 data might be explained by post-translational modifications or regulation affecting  
576 protein stability, degradation and complex formation, as shown in similar cases (Flory  
577 et al., 2006; Liu et al., 2016). Alternatively, this discrepancy may be explained by a  
578 recently proposed model showing that in growing cells, mRNA can saturate ribosomes  
579 thereby limiting translation, resulting in an increase in the protein-to-DNA ratio (Lin  
580 and Amir, 2018).

## 581 **Summary**

582 To summarize, we found that pectin, a prominent plant cell wall polysaccharide,  
583 facilitates expansion of flavobacteria on solid surfaces, even in the presence of nutrient-  
584 rich media. We postulate that pectin may enhance the capacity of flavobacteria to  
585 efficiently colonize and proliferate on plant surfaces. The interaction between pectin  
586 (and potentially other root glycans) and flavobacteria is mediated by induction of  
587 TonB/SusC operons and other associated PULs that facilitate metabolism of pectin.  
588 Thus, in the root environment, plant cell wall polysaccharides, and specifically pectin,  
589 may not only serve as a nutrient source for flavobacteria, but also as a potential  
590 environmental cue for colonization and rapid expansion along the root surface.

591

592 **Acknowledgments:** We thank Prof. M. J. McBride from the University of  
593 Wisconsin–Milwaukee for generously providing plasmids and *F. johnsoniae* strains.  
594 We would like to thank Alla Usyskin-Tonne, for her help with the proteomics functional  
595 annotation and Eduard Belausov for his help with the binocular based imaging. This  
596 paper was published at bioRxiv as preprint,  
597 doi: <https://doi.org/10.1101/2020.06.26.174714>.

598 **References**

- 599 Agarwal S., Hunnicutt, D. W., and McBride, M. J. (2001). Cloning and  
600 Characterization of the *Flavobacterium johnsoniae* Gliding Motility Genes *gldD*  
601 and *gldE*. *J. Bacteriol.* 183, 4167–4175. doi:10.1128/JB.183.14.4167-4175.2001.
- 602 Alexander, B. J. R., and Stewart, A. (2001). Glasshouse screening for biological  
603 control agents of *Phytophthora cactorum* on apple ( *Malus domestica* ). *New*  
604 *Zeal. J. Crop Hortic. Sci.* 29, 159–169. doi:10.1080/01140671.2001.9514174.
- 605 Arlauskas, J., and Burchard, R. P. (1982). Substratum requirements for bacterial  
606 gliding motility. *Arch. Microbiol.* 133, 137–141. doi:10.1007/BF00413527.
- 607 Barret, M., Morrissey, J. P., and O’Gara, F. (2011). Functional genomics analysis of  
608 plant growth-promoting rhizobacterial traits involved in rhizosphere competence.  
609 *Biol. Fertil. Soils* 47, 729–743. doi:10.1007/s00374-011-0605-x.
- 610 Beauregard, P. B., Chai, Y., Vlamakis, H., Losick, R., and Kolter, R. (2013). *Bacillus*  
611 *subtilis* biofilm induction by plant polysaccharides. *Proc. Natl. Acad. Sci.* 110,  
612 E1621–E1630. doi:10.1073/pnas.1218984110.
- 613 Berendsen, R. L., Pieterse, C. M. J., and Bakker, P. A. H. M. (2012). The rhizosphere  
614 microbiome and plant health. *Trends Plant Sci.* 17, 478–486.  
615 doi:10.1016/j.tplants.2012.04.001.
- 616 Bodenhausen, N., Horton, M. W., and Bergelson, J. (2013). Bacterial Communities  
617 Associated with the Leaves and the Roots of *Arabidopsis thaliana*. *PLoS One* 8,  
618 e56329. doi:10.1371/journal.pone.0056329.
- 619 Braun, T. F., and McBride, M. J. (2005). *Flavobacterium johnsoniae* *GldJ* Is a  
620 Lipoprotein That Is Required for Gliding Motility. *J. Bacteriol.* 187, 2628–2637.  
621 doi:10.1128/JB.187.8.2628-2637.2005.
- 622 Bulgarelli, D., Garrido-Oter, R., Münch, P. C., Weiman, A., Dröge, J., Pan, Y., et al.  
623 (2015). Structure and Function of the Bacterial Root Microbiota in Wild and  
624 Domesticated Barley. *Cell Host Microbe* 17, 392–403.  
625 doi:10.1016/j.chom.2015.01.011.
- 626 Bulgarelli, D., Schlaeppi, K., Spaepen, S., van Themaat, E. V. L., and Schulze-Lefert,  
627 P. (2013). Structure and Functions of the Bacterial Microbiota of Plants. *Annu.*  
628 *Rev. Plant Biol.* 64, 807–838. doi:10.1146/annurev-arplant-050312-120106.
- 629 Carrión, V. J., Perez-Jaramillo, J., Cordovez, V., Tracanna, V., de Hollander, M.,  
630 Ruiz-Buck, D., et al. (2019). Pathogen-induced activation of disease-suppressive

- 631 functions in the endophytic root microbiome. *Science* (80-. ). 366, 606–612.  
632 doi:10.1126/science.aaw9285.
- 633 Cremer, J., Honda, T., Tang, Y., Wong-Ng, J., Vergassola, M., and Hwa, T. (2019).  
634 Chemotaxis as a navigation strategy to boost range expansion. *Nature* 575, 658–  
635 663. doi:10.1038/s41586-019-1733-y.
- 636 Dennis, P. G., Miller, A. J., and Hirsch, P. R. (2010). Are root exudates more  
637 important than other sources of rhizodeposits in structuring rhizosphere bacterial  
638 communities? *FEMS Microbiol. Ecol.* 72, 313–327. doi:10.1111/j.1574-  
639 6941.2010.00860.x.
- 640 Feng, H., Zhang, N., Fu, R., Liu, Y., Krell, T., Du, W., et al. (2019). Recognition of  
641 dominant attractants by key chemoreceptors mediates recruitment of plant  
642 growth-promoting rhizobacteria. *Environ. Microbiol.* 21, 402–415.  
643 doi:10.1111/1462-2920.14472.
- 644 Flory, M. R., Lee, H., Bonneau, R., Mallick, P., Serikawa, K., Morris, D. R., et al.  
645 (2006). Quantitative proteomic analysis of the budding yeast cell cycle using  
646 acid-cleavable isotope-coded affinity tag reagents. *Proteomics* 6, 6146–6157.  
647 doi:10.1002/pmic.200600159.
- 648 Foley, M. H., Cockburn, D. W., and Koropatkin, N. M. (2016). The Sus operon: a  
649 model system for starch uptake by the human gut Bacteroidetes. *Cell. Mol. Life*  
650 *Sci.* 73, 2603–2617. doi:10.1007/s00018-016-2242-x.
- 651 Gorski, L., Godchaux, W., and Leadbetter, E. R. (1993). Structural specificity of  
652 sugars that inhibit gliding motility of *Cytophaga johnsonae*. *Arch. Microbiol.*  
653 160, 121–125. doi:10.1007/BF00288713.
- 654 Gunasinghe, R. N., Ikiriwatte, C. J., and Karunaratne, A. M. (2004). The use of  
655 *Pantoea agglomerans* and *Flavobacterium* sp . to control banana pathogens. *J.*  
656 *Hortic. Sci. Biotechnol.* 79, 1002–1006. doi:10.1080/14620316.2004.11511852.
- 657 Hebbar, P., Berge, O., Heulin, T., and Singh, S. P. (1991). Bacterial antagonists of  
658 Sunflower (*Helianthus annuus* L.) fungal pathogens. *Plant Soil* 133, 131–140.  
659 doi:10.1007/BF00011907.
- 660 Huang, B., Ru, K., Yuan, Z., Whitchurch, C. B., and Mattick, J. S. (2004). tonB3 Is  
661 Required for Normal Twitching Motility and Extracellular Assembly of Type IV  
662 Pili. *J. Bacteriol.* 186, 4387–4389. doi:10.1128/JB.186.13.4387-4389.2004.
- 663 Imamura, K., Sato, K., Narita, Y., Kondo, Y., Nakane, D., Naito, M., et al. (2018).  
664 Identification of a major glucose transporter in *Flavobacterium johnsoniae* :

- 665 Inhibition of *F. johnsoniae* colony spreading by glucose uptake. *Microbiol.*  
666 *Immunol.* 62, 507–516. doi:10.1111/1348-0421.12633.
- 667 Janssen, P. H. (2006). Identifying the Dominant Soil Bacterial Taxa in Libraries of  
668 16S rRNA and 16S rRNA Genes. *Appl. Environ. Microbiol.* 72, 1719–1728.  
669 doi:10.1128/AEM.72.3.1719-1728.2006.
- 670 Jiménez, D. J., Chaves-Moreno, D., and van Elsas, J. D. (2015). Unveiling the  
671 metabolic potential of two soil-derived microbial consortia selected on wheat  
672 straw. *Sci. Rep.* 5, 13845. doi:10.1038/srep13845.
- 673 Johansen, J. E., Binnerup, S. J., Lejbolle, K. B., Mascher, F., Sorensen, J., and Keel,  
674 C. (2002). Impact of biocontrol strain *Pseudomonas fluorescens* CHA0 on  
675 rhizosphere bacteria isolated from barley (*Hordeum vulgare* L.) with special  
676 reference to Cytophaga-like bacteria. *J. Appl. Microbiol.* 93, 1065–1074.  
677 doi:10.1046/j.1365-2672.2002.01778.x.
- 678 Johnston, J. J., Shrivastava, A., and McBride, M. J. (2018). Untangling  
679 *Flavobacterium johnsoniae* gliding motility and protein secretion. *J. Bacteriol.*  
680 200. doi:10.1128/JB.00362-17.
- 681 Kharade, S. S., and McBride, M. J. (2015). *Flavobacterium johnsoniae* PorV Is  
682 Required for Secretion of a Subset of Proteins Targeted to the Type IX Secretion  
683 System. *J. Bacteriol.* 197, 147–158. doi:10.1128/JB.02085-14.
- 684 Kolton, M., Frenkel, O., Elad, Y., and Cytryn, E. (2014a). Potential Role of  
685 *Flavobacterial* Gliding-Motility and Type IX Secretion System Complex in Root  
686 Colonization and Plant Defense. *Mol. Plant-Microbe Interact.* 27, 1005–1013.  
687 doi:10.1094/MPMI-03-14-0067-R.
- 688 Kolton, M., Frenkel, O., Elad, Y., and Cytryn, E. (2014b). Potential Role of  
689 *Flavobacterial* Gliding-Motility and Type IX Secretion System Complex in Root  
690 Colonization and Plant Defense. *Mol. Plant-Microbe Interact.* 27, 1005–1013.  
691 doi:10.1094/mpmi-03-14-0067-r.
- 692 Kolton, M., Meller Harel, Y., Pasternak, Z., Graber, E. R., Elad, Y., and Cytryn, E.  
693 (2011). Impact of Biochar Application to Soil on the Root-Associated Bacterial  
694 Community Structure of Fully Developed Greenhouse Pepper Plants. *Appl.*  
695 *Environ. Microbiol.* 77, 4924–4930. doi:10.1128/AEM.00148-11.
- 696 Kolton, M., Sela, N., Elad, Y., and Cytryn, E. (2013). Comparative Genomic Analysis  
697 Indicates that Niche Adaptation of Terrestrial *Flavobacteria* Is Strongly Linked  
698 to Plant Glycan Metabolism. *PLoS One* 8, e76704.

- 699 doi:10.1371/journal.pone.0076704.
- 700 Kwak, M.-J., Kong, H. G., Choi, K., Kwon, S.-K., Song, J. Y., Lee, J., et al. (2018).  
701 Rhizosphere microbiome structure alters to enable wilt resistance in tomato. *Nat.*  
702 *Biotechnol.* 36, 1100–1109. doi:10.1038/nbt.4232.
- 703 Lauber, F., Deme, J. C., Lea, S. M., and Berks, B. C. (2018). Type 9 secretion system  
704 structures reveal a new protein transport mechanism. *Nature* 564, 77–82.  
705 doi:10.1038/s41586-018-0693-y.
- 706 Lin, J., and Amir, A. (2018). Homeostasis of protein and mRNA concentrations in  
707 growing cells. *Nat. Commun.* 9, 4496. doi:10.1038/s41467-018-06714-z.
- 708 Liu, W., Cremer, J., Li, D., Hwa, T., and Liu, C. (2019). An evolutionarily stable  
709 strategy to colonize spatially extended habitats. *Nature* 575, 664–668.  
710 doi:10.1038/s41586-019-1734-x.
- 711 Liu, Y., Beyer, A., and Aebersold, R. (2016). On the Dependency of Cellular Protein  
712 Levels on mRNA Abundance. *Cell* 165, 535–550.  
713 doi:10.1016/j.cell.2016.03.014.
- 714 Lugtenberg, B. J. J., and Dekkers, L. C. (1999). What makes *Pseudomonas* bacteria  
715 rhizosphere competent? *Environ. Microbiol.* 1, 9–13. doi:10.1046/j.1462-  
716 2920.1999.00005.x.
- 717 Lundberg, D. S., Lebeis, S. L., Paredes, S. H., Yourstone, S., Gehring, J., Malfatti, S.,  
718 et al. (2012). Defining the core *Arabidopsis thaliana* root microbiome. *Nature*  
719 488, 86–90. doi:10.1038/nature11237.
- 720 Manter, D. K., Delgado, J. A., Holm, D. G., and Stong, R. A. (2010). Pyrosequencing  
721 Reveals a Highly Diverse and Cultivar-Specific Bacterial Endophyte Community  
722 in Potato Roots. *Microb. Ecol.* 60, 157–166. doi:10.1007/s00248-010-9658-x.
- 723 Martens, E. C., Koropatkin, N. M., Smith, T. J., and Gordon, J. I. (2009). Complex  
724 Glycan Catabolism by the Human Gut Microbiota: The Bacteroidetes Sus-like  
725 Paradigm. *J. Biol. Chem.* 284, 24673–24677. doi:10.1074/jbc.R109.022848.
- 726 Massalha, H., Korenblum, E., Malitsky, S., Shapiro, O. H., and Aharoni, A. (2017).  
727 Live imaging of root–bacteria interactions in a microfluidics setup. *Proc. Natl.*  
728 *Acad. Sci.* 114, 4549–4554. doi:10.1073/pnas.1618584114.
- 729 McBride, M. J., and Baker, S. A. (1996). Development of techniques to genetically  
730 manipulate members of the genera *Cytophaga*, *Flavobacterium*, *Flexibacter*, and  
731 *Sporocytophaga*. *Appl. Environ. Microbiol.* 62, 3017–3022.
- 732 McBride, M. J., Liu, W., Lu, X., Zhu, Y., and Zhang, W. (2014). “The Family

- 733        Cytophagaceae,” in *The Prokaryotes* (Berlin, Heidelberg: Springer Berlin  
734        Heidelberg), 577–593. doi:10.1007/978-3-642-38954-2\_382.
- 735    McBride, M. J., and Nakane, D. (2015). Flavobacterium gliding motility and the type  
736        IX secretion system. *Curr. Opin. Microbiol.* 28, 72–77.  
737        doi:10.1016/j.mib.2015.07.016.
- 738    McBride, M. J., Xie, G., Martens, E. C., Lapidus, A., Henrissat, B., Rhodes, R. G., et  
739        al. (2009). Novel Features of the Polysaccharide-Digesting Gliding Bacterium  
740        Flavobacterium johnsoniae as Revealed by Genome Sequence Analysis. *Appl.*  
741        *Environ. Microbiol.* 75, 6864–6875. doi:10.1128/AEM.01495-09.
- 742    Molina, M. A., Godoy, P., Ramos-Gonzalez, M. I., Munoz, N., Ramos, J. L., and  
743        Espinosa-Urgel, M. (2005). Role of iron and the TonB system in colonization of  
744        corn seeds and roots by *Pseudomonas putida* KT2440. *Environ. Microbiol.* 7,  
745        443–449. doi:10.1111/j.1462-2920.2005.00720.x.
- 746    Nikolouli, K., and Mossialos, D. (2012). Bioactive compounds synthesized by non-  
747        ribosomal peptide synthetases and type-I polyketide synthases discovered  
748        through genome-mining and metagenomics. *Biotechnol. Lett.* 34, 1393–1403.  
749        doi:10.1007/s10529-012-0919-2.
- 750    Oku, S., Ayaka, K., Takahisa, T. K., and Junichi, Y. N. (2012). Identification of  
751        Chemotaxis Sensory Proteins for Amino Acids in *Pseudomonas fluorescens* Pf0-  
752        1 and Their Involvement in Chemotaxis to Tomato Root Exudate and Root  
753        Colonization. *Microbes Env.* 27, 462–469. doi:10.1111/1462-2920.12228.
- 754    Overbeek, R., Olson, R., Pusch, G. D., Olsen, G. J., Davis, J. J., Disz, T., et al. (2014).  
755        The SEED and the Rapid Annotation of microbial genomes using Subsystems  
756        Technology (RAST). *Nucleic Acids Res.* 42, D206–D214.  
757        doi:10.1093/nar/gkt1226.
- 758    Perez-Riverol, Y., Csordas, A., Bai, J., Bernal-Llinares, M., Hewapathirana, S.,  
759        Kundu, D. J., et al. (2019). The PRIDE database and related tools and resources  
760        in 2019: improving support for quantification data. *Nucleic Acids Res.* 47, D442–  
761        D450. doi:10.1093/nar/gky1106.
- 762    Pieterse, M. J., Zamioudis, C., Berendsen, R. L., Weller, D. M., Wees, S. C. M. Van,  
763        and Bakker, P. A. H. M. (2014). Induced Systemic Resistance by Beneficial  
764        Microbes. doi:10.1146/annurev-phyto-082712-102340.
- 765    Postle, K. (2007). “TonB System, In Vivo Assays and Characterization,” in *Methods*  
766        *in Enzymology*, 245–269. doi:10.1016/S0076-6879(06)22012-3.



- 767 Postle, K., and Kadner, R. J. (2003). Touch and go: Tying TonB to transport. *Mol.*  
768 *Microbiol.* 49, 869–882. doi:10.1046/j.1365-2958.2003.03629.x.
- 769 Reinhold-Hurek, B., Bünger, W., Burbano, C. S., Sabale, M., and Hurek, T. (2015).  
770 Roots Shaping Their Microbiome: Global Hotspots for Microbial Activity. *Annu.*  
771 *Rev. Phytopathol.* 53, 403–424. doi:10.1146/annurev-phyto-082712-102342.
- 772 Rudrappa, T., Czymmek, K. J., Paré, P. W., and Bais, H. P. (2008). Root-Secreted  
773 Malic Acid Recruits Beneficial Soil Bacteria. *Plant Physiol.* 148, 1547–1556.  
774 doi:10.1104/pp.108.127613.
- 775 Sang, M. K., Kim, J. Do, Kim, B. S., and Kim, K. D. (2011). Root Treatment with  
776 Rhizobacteria Antagonistic to Phytophthora Blight Affects Anthracnose  
777 Occurrence, Ripening, and Yield of Pepper Fruit in the Plastic House and Field.  
778 *Phytopathology* 101, 666–678. doi:10.1094/PHYTO-08-10-0224.
- 779 Sang, M. K., and Kim, K. D. (2012). The volatile-producing Flavobacterium  
780 johnsoniae strain GSE09 shows biocontrol activity against Phytophthora capsici  
781 in pepper. *J. Appl. Microbiol.* 113, 383–398. doi:10.1111/j.1365-  
782 2672.2012.05330.x.
- 783 Sasse, J., Martinoia, E., and Northen, T. (2018). Feed Your Friends: Do Plant  
784 Exudates Shape the Root Microbiome? *Trends Plant Sci.* 23, 25–41.  
785 doi:10.1016/j.tplants.2017.09.003.
- 786 Sato, K., Naya, M., Hatano, Y., Kondo, Y., Sato, M., Narita, Y., et al. (2021). Colony  
787 spreading of the gliding bacterium Flavobacterium johnsoniae in the absence of  
788 the motility adhesin SprB. *Sci. Rep.* 11, 967. doi:10.1038/s41598-020-79762-5.
- 789 Schindelin, J., Arganda-Carreras, I., Frise, E., Kaynig, V., Longair, M., Pietzsch, T.,  
790 et al. (2012). Fiji: an open-source platform for biological-image analysis. *Nat.*  
791 *Methods* 9, 676–682. doi:10.1038/nmeth.2019.
- 792 Sela, N., Cytryn, E., Green, S. J., Harel, Y. M., Kolton, M., and Elad, Y. (2012). Draft  
793 Genome Sequence of Flavobacterium sp. Strain F52, Isolated from the  
794 Rhizosphere of Bell Pepper (*Capsicum annuum* L. cv. Maccabi). *J. Bacteriol.*  
795 194, 5462–5463. doi:10.1128/jb.01249-12.
- 796 Shrivastava, A., Johnston, J. J., Van Baaren, J. M., and McBride, M. J. (2013).  
797 Flavobacterium johnsoniae GldK, GldL, GldM, and SprA are required for  
798 secretion of the cell surface gliding motility adhesins sprb and remA. *J.*  
799 *Bacteriol.* 195, 3201–3212. doi:10.1128/JB.00333-13.
- 800 Shrivastava, A., Rhodes, R. G., Pochiraju, S., Nakane, D., and McBride, M. J. (2012).

- 801 Flavobacterium johnsoniae RemA is a mobile cell surface lectin involved in  
802 gliding. *J. Bacteriol.* 194, 3678–3688. doi:10.1128/JB.00588-12.
- 803 Staroscik, A. M., Hunnicutt, D. W., Archibald, K. E., and Nelson, D. R. (2008).  
804 Development of methods for the genetic manipulation of Flavobacterium  
805 columnare. *BMC Microbiol.* 8, 1–11. doi:10.1186/1471-2180-8-115.
- 806 Tchoufag, J., Ghosh, P., Pogue, C. B., Nan, B., and Mandadapu, K. K. (2019).  
807 Mechanisms for bacterial gliding motility on soft substrates. *Proc. Natl. Acad.*  
808 *Sci.* 116, 25087–25096. doi:10.1073/pnas.1914678116.
- 809 Teeling, H., Fuchs, B. M., Becher, D., Klockow, C., Gardebrecht, A., Bennis, C. M.,  
810 et al. (2012). Substrate-Controlled Succession of Marine Bacterioplankton  
811 Populations Induced by a Phytoplankton Bloom. *Science (80-. )*. 336, 608–611.  
812 doi:10.1126/science.1218344.
- 813 Vorhölter, F.-J., Wiggerich, H.-G., Scheidle, H., Sidhu, V. K., Mrozek, K., Küster, H.,  
814 et al. (2012). Involvement of bacterial TonB-dependent signaling in the  
815 generation of an oligogalacturonide damage-associated molecular pattern from  
816 plant cell walls exposed to Xanthomonas campestris pv. campestris pectate  
817 lyases. *BMC Microbiol.* 12, 239. doi:10.1186/1471-2180-12-239.
- 818 Webb, B. A., Compton, K. K., del Campo, J. S. M., Taylor, D., Sobrado, P., and  
819 Scharf, B. E. (2017). Sinorhizobium meliloti Chemotaxis to Multiple Amino  
820 Acids Is Mediated by the Chemoreceptor McpU. *Mol. Plant-Microbe Interact.*  
821 30, 770–777. doi:10.1094/MPMI-04-17-0096-R.
- 822 Wei, Z., Gu, Y., Friman, V.-P., Kowalchuk, G. A., Xu, Y., Shen, Q., et al. (2019).  
823 Initial soil microbiome composition and functioning predetermine future plant  
824 health. *Sci. Adv.* 5, eaaw0759. doi:10.1126/sciadv.aaw0759.
- 825 Williams, A., Wilkinson, A., Krehenbrink, M., Russo, D. M., Zorreguieta, A., and  
826 Downie, J. A. (2008). Glucomannan-mediated attachment of Rhizobium  
827 leguminosarum to pea root hairs is required for competitive nodule infection. *J.*  
828 *Bacteriol.* 190, 4706–4715. doi:10.1128/JB.01694-07.
- 829 Wolkin, R. H., and Pate, J. L. (1984). Translocation of motile cells of the gliding  
830 bacterium Cytophaga johnsonae depends on a surface component that may be  
831 modified by sugars. *J. Gen. Microbiol.* 130, 2651–2669. doi:10.1099/00221287-  
832 130-10-2651.
- 833 Wu, K., Fang, Z., Guo, R., Pan, B., Shi, W., Yuan, S., et al. (2015). Pectin Enhances  
834 Bio-Control Efficacy by Inducing Colonization and Secretion of Secondary

835 Metabolites by *Bacillus amyloliquefaciens* SQY 162 in the Rhizosphere of  
836 Tobacco. *PLoS One* 10, e0127418. doi:10.1371/journal.pone.0127418.  
837 Xue, C., Ryan Penton, C., Shen, Z., Zhang, R., Huang, Q., Li, R., et al. (2015).  
838 Manipulating the banana rhizosphere microbiome for biological control of  
839 Panama disease. *Sci. Rep.* 5, 11124. doi:10.1038/srep11124.  
840 Yan, Y., Yang, J., Dou, Y., Chen, M., Ping, S., Peng, J., et al. (2008). Nitrogen  
841 fixation island and rhizosphere competence traits in the genome of root-  
842 associated *Pseudomonas stutzeri* A1501. *Proc. Natl. Acad. Sci.* 105, 7564–7569.  
843 doi:10.1073/pnas.0801093105.  
844 Zimblér, D. L., Arivett, B. A., Beckett, A. C., Menke, S. M., and Actis, L. A. (2013).  
845 Functional Features of TonB Energy Transduction Systems of *Acinetobacter*  
846 *baumannii*. *Infect. Immun.* 81, 3382–3394. doi:10.1128/IAI.00540-13.  
847  
848  
849  
850  
851  
852  
853  
854  
855  
856  
857  
858  
859  
860  
861  
862  
863

864 **Figures**

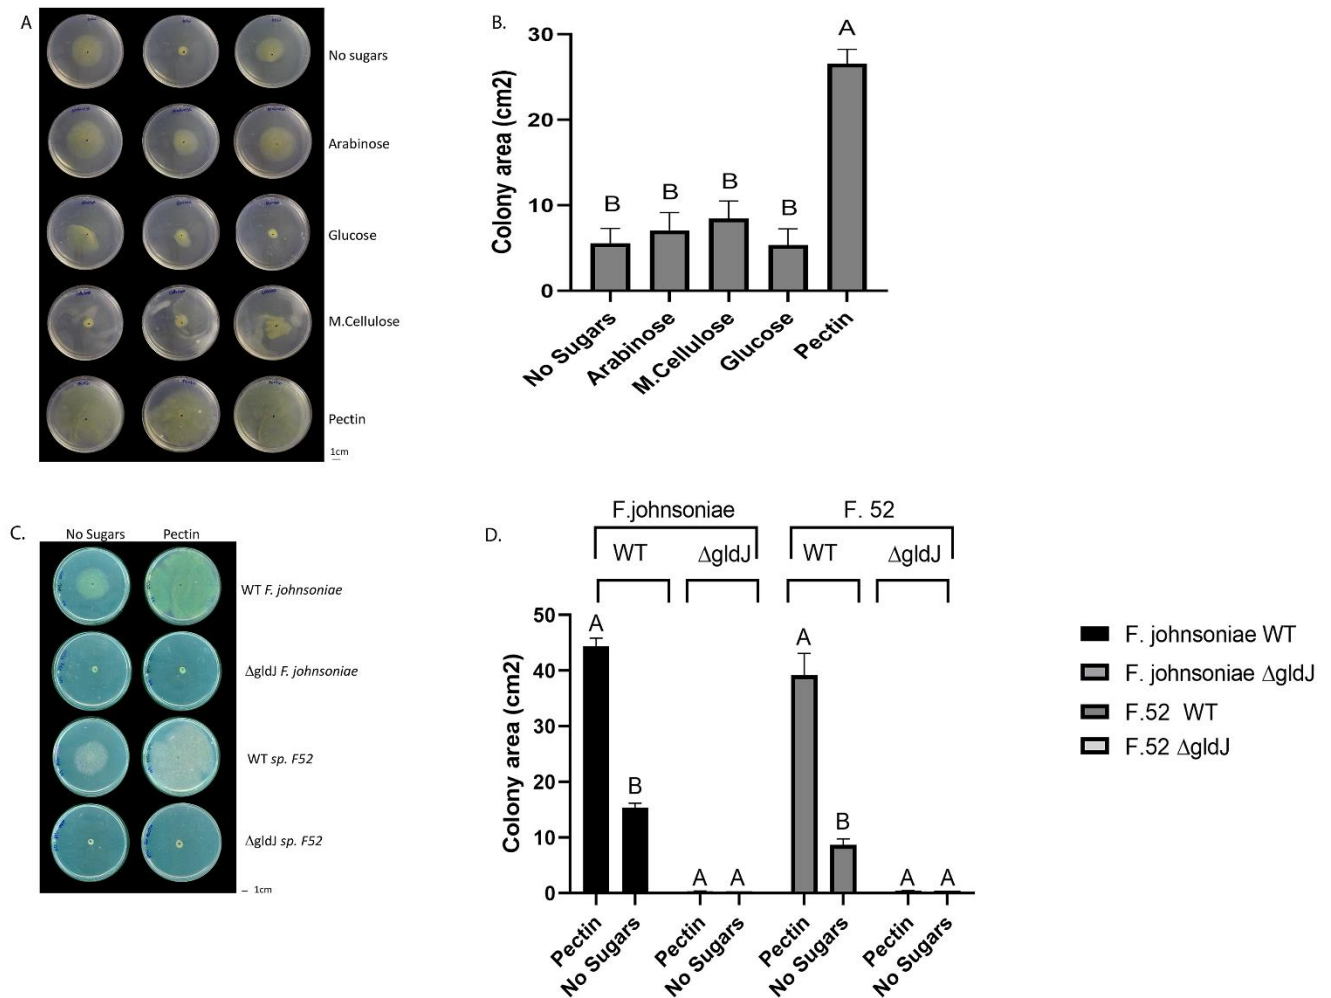

865

866 **Fig1 - Impact of plant-derived poly- and mono- saccharides on proliferation of**  
 867 **flavobacteria.** Image (A) and quantification (B) of colony area of *F. johnsoniae* colony  
 868 expansion on PY2 agar amended with different mono- and polysaccharides: arabinose,  
 869 glucose, M.cellulose (M.Cellulose), pectin and the no sugar (DDW control), after 48hr  
 870 incubation at 30°C (N=4). Figure represents one experiment (out of four) with 3  
 871 technical repeats in each. Error bars represents standard error. Image (C) and  
 872 quantification (D) of colony expansion on PY2 agar of wild type (WT) and gliding  
 873 mutants ( $\Delta$ gldJ) of *F. johnsoniae* and *Flavobacterium* sp. F52, amended with DDW (no  
 874 sugar) or 2% pectin after 48hr incubation at 30°C (N=3). Colony area was measured  
 875 using Fiji. Letters indicate statistical significance calculated using  $\text{\textcircled{R}}$ JMP Pro14, was  
 876 considered significant if  $p < 0.05$  by Tukey HSD. Error bars represents standard error.

877

878

879

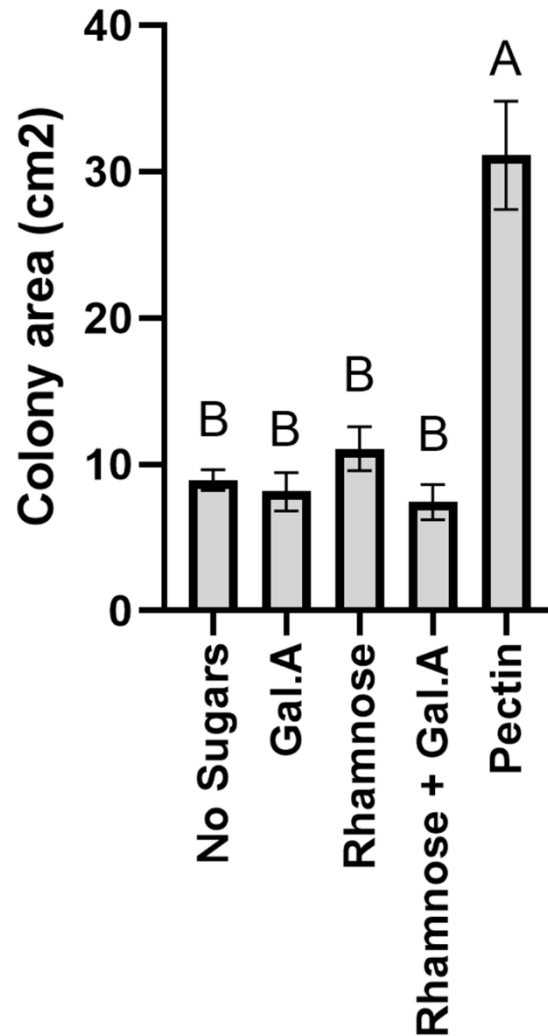

880

881 **Fig2 - Impact of pectin precursors (galacturonic acid and rhamnose) on**  
882 **proliferation of flavobacteria.** Graphic description of *F. johnsoniae* colony area on  
883 PY2 agar amended with DDW, pectin galacturonic acid, rhamnose and galacturonic  
884 acid and rhamnose incubated at 30°C for 48 h (N=8). Statistics significance was  
885 calculated using ®JMP Pro14, and means was considered significant when p<0.05 by  
886 Tukey HSD. Error bars represents standard error.

887

888

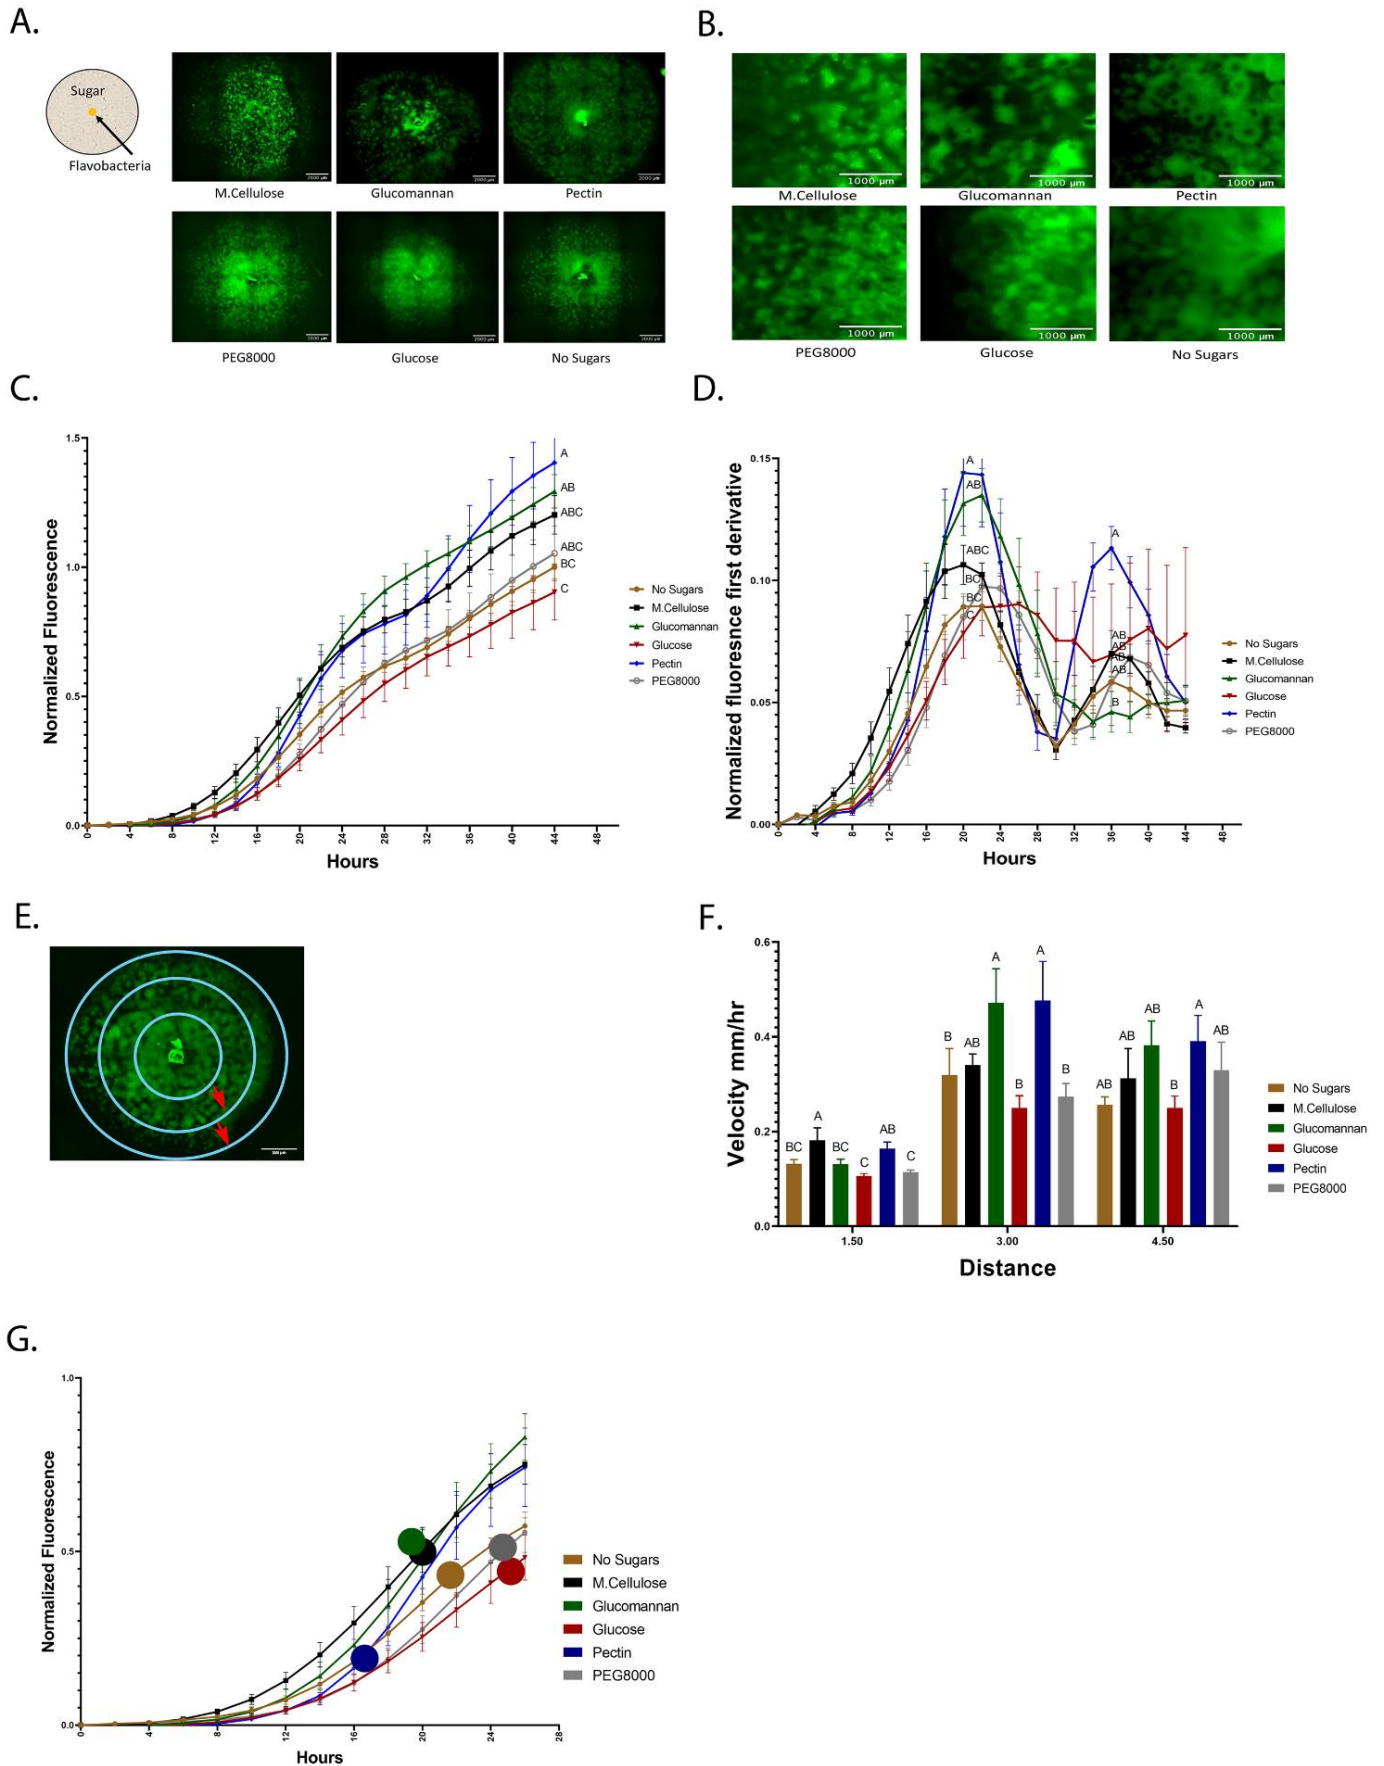

890 **Fig3 - Temporal dynamics of flavobacterial proliferation on polysaccharides using**  
891 **live imaging microscopy.** (A) Morphology of GFP-labeled *F. johnsoniae* colonies on  
892 PY2 agar amended with selected plant-derived poly- and mono- saccharides:  
893 M.cellulose, glucomannan, pectin, glucose and PEG8000 and DDW (no sugar control).  
894 Bacteria were inoculated in the center of PY2 agar coated with the indicated substances  
895 (schematically described in the insert). Images show colony morphology after 32hr. (B)  
896 Enlarged image of GFP-*F. johnsoniae* colony morphology after 16hr of growth on the  
897 selected plant-derived poly- and mono- saccharides as indicated in (A). (C) Growth  
898 rates of GFP-*F. johnsoniae* colonies on the selected plant-derived poly- and mono-  
899 saccharides. Data was normalized as described in the materials and methods section.  
900 Differences in the average colony fluorescence intensity after 44 hr was compared and  
901 considered significant if  $p < 0.05$  by Tukey HSD (indicated by letters). Data includes  
902 means and data from three biological replicates composed of three technical repeats in  
903 each. (D) Temporal dynamics of GFP-*F. johnsoniae* growth rates. Growth was  
904 compared at the peaks (20hr and 36hr) and considered significant if  $p < 0.05$  by Tukey  
905 HSD. (E) Schematic diagram showing the three characterized regions of interest (ROI-  
906 1.5, 3 and 4.5 mm radii) used to evaluate of bacterial expansion rates. (F) Estimated  
907 expansion rates of GFP-*F. johnsoniae* on the selected plant-derived poly- and mono-  
908 saccharides. Velocity was estimated by expansion time in hours taken to cross known  
909 ROIs as indicated in E. Differences between treatments were considered significant  
910 when  $p < 0.05$  by Student T test (G) Estimated expansion time relative to estimated  
911 growth of GFP-*F. johnsoniae* on the selected plant-derived poly- and mono-  
912 saccharides. Colored circles mark time (h) for bacteria to cross the 4.5mm radius on  
913 each substance as calculated in F. All error bars represents standard error.

914

915

916

917

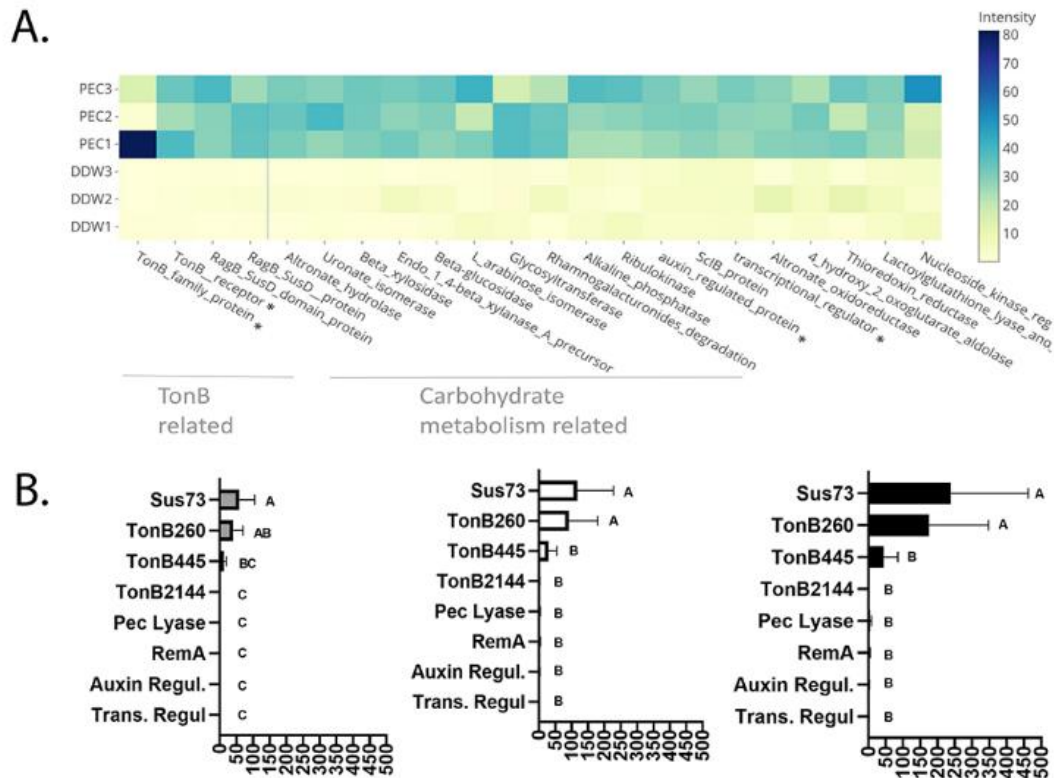

918 **Fig4 - Pectin induced flavobacterial genes and proteins.** (A) Differential expression  
 919 of the 25 most substantial pectin induced proteins based on proteomic analysis of *F.*  
 920 *johnsoniae* colonies grown on PY2 medium amended with pectin relative to colonies  
 921 grown on identical media amended without pectin (DDW). Heat map shows triplicates  
 922 for each treatment. All described proteins are statistically significant ( $p < 0.05$ ). The  
 923 asterisk (\*) marks proteins that were examined by qPCR. From left to right: TonB450,  
 924 TonB260, Auxin regulator, Transcriptional regulator (B) The mRNA expression level  
 925 of selected proteins Sus73 (SHH12854.1), TonB260 (WP\_012026229.1), TonB445  
 926 (WP\_012022294.1), TonB2144 (WP\_012026069.1), Auxin regulator  
 927 (WP\_012023111.1), Transcriptional regulator (WP\_012022876.1), Pectate lyase  
 928 (WP\_012026072.1) and RemA (WP\_012022896.1) shown to be induced in the  
 929 proteomic analysis described in (A), using quantitative real-time PCR (qPCR). Fold  
 930 changes in mRNA levels of the target genes were normalized against the 16SrRNA  
 931 gene (left), the Electron transfer Flavoprotein, alpha subunit (WP\_012023552.1)  
 932 (center), and the DNA gyrase subunit B (WP\_012024321.1)(right). Change in target  
 933 genes fold change RNA expression was calculated using the  $2^{-\Delta\Delta CT}$  method and  
 934 statistical significance ( $p < 0.05$ ) by Student T-test. Error bars represent standard errors  
 935 of six independent experiments based on two independent RNA extractions.
